# Supplementary material for: Coenzyme Q10: A Biomarker in the Differential Diagnosis of Parkinsonian Syndromes
Source: MDPI journal article supplement (doi:10.3390/antiox12122104), 2023-12-12
Supplement: s1 [file s1]

# Coenzyme Q10: A Biomarker in the Differential Diagnosis of Parkinsonian Syndromes

Tereza Bartošová, Jiří Klempíř and Hana Hansíková

## Supplementary data

**Table S1.** The results of plasma and lymphocytes levels of coenzyme Q10 in patients with multiple system atrophy and the clinical scales.

| Patient. | Sex | Age [y] | Years of progression | NNIPPS PPS*** | UMSARS** | P-Q10 [µg/ml]* | P-chol [mmol/l] | P-Q10/cho l | L-Q10/CS | L-Q10 [pmol/mg]* | L-CS [nmol/min/mg] |
|----------|-----|---------|----------------------|---------------|----------|----------------|-----------------|-------------|----------|------------------|--------------------|
| P1       | M   | 70      | 5.5                  | 106           | 57       | 0.71           | 3.9             | 0.182       | 1.36     | 96.97            | 71.16              |
| P2       | F   | 60      | 5                    | 134           | 85       | 0.54           | 3.87            | 0.14        | 0.74     | 58.33            | 79.27              |
| P3       | F   | 63      | 3                    | 133           | 52       | 0.7            | 4.39            | 0.159       | 0.73     | 45.26            | 61.81              |
| P4       | M   | 79      | 7.5                  | 101           | 56       | 0.57           | 3.93            | 0.145       | 1.01     | 68.35            | 67.52              |
| P5       | F   | 66      | 5.5                  | 191           | 87       | 0.8            | nd              | nd          | 0.85     | 60.66            | 71.13              |
| P6       | M   | 65      | 11                   | 240           | 93       | 0.37           | nd              | nd          | 1.3      | 50.55            | 38.92              |
| P7       | F   | 73      | 5                    | 129           | 73       | 0.57           | 4.66            | 0.122       | 1.16     | 87.87            | 75.75              |
| P8       | M   | 55      | 7                    | 94            | 51       | 0.66           | 4.38            | 0.151       | 0.97     | 70.51            | 72.38              |
| P9       | M   | 61      | 5                    | 152           | 95       | 0.4            | 3.93            | 0.102       | 1.19     | 60.4             | 50.91              |
| P10      | F   | 57      | 2                    | nd            | nd       | nd             | nd              | nd          | 1.07     | 80.43            | 75.5               |
| P11      | M   | 79      | 3                    | 118           | 66       | 0.67           | 5.27            | 0.127       | 0.95     | 65.85            | 69.53              |
| P12      | F   | 67      | 3,5                  | 119           | 62       | 0.67           | 3,82            | 0.175       | 1.4      | 92.36            | 65.77              |
| P13      | F   | 79      | 8                    | 88            | 34       | 0.46           | 3.77            | nd          | 1.35     | 101.9            | 75.52              |
| P14      | M   | 49      | 4.5                  | 124           | 66       | 0.66           | 4,3             | 0.153       | 1.35     | 79.75            | 59.03              |
| P15      | F   | 74      | 4.5                  | 132           | 69       | 0.798          | 6.14            | 0.13        | 1.32     | 109.64           | 82.94              |
| P16      | M   | 55      | 4                    | 119           | 65       | 0.394          | 5.76            | 0.068       | 1.13     | 90.76            | 80.19              |
| P17      | M   | 55      | 4.5                  | 103           | 56       | 0.572          | 5.06            | 0.113       | 0.88     | 74.92            | 85.03              |
| P18      | F   | 53      | 3.5                  | 38            | 31       | 0.874          | 5.79            | 0.15        | 1.18     | 88.04            | 74.62              |
| P19      | M   | 54      | 4                    | 103           | 56       | 0.634          | 4.9             | 0.13        | 1.18     | 89.26            | 75.44              |
| P20      | F   | 62      | 5                    | 116           | 67       | 0.596          | 5.37            | 0.11        | 0.92     | 66.38            | 72.41              |
| N        |     | 20      | 20                   | 19            | 19       | 19             | 17              | 17          | 20       | 20               | 20                 |
| Average  |     | 63.8    | 5,05                 | 123.15        | 64.26    | 0.61           | 4.66            | 0.13        | 1.1      | 76.9             | 70.24              |
| Median   |     | 62.5    | 4.75                 | 119           | 65       | 0.634          | 4.39            | 0.135       | 1.145    | 77.335           | 72.395             |
| Q1       |     | 55      | 3.625                | 103           | 56       | 0.54           | 3.915           | 0.11525     | 0.9275   | 61.9575          | 66.2075            |
| Q2       |     | 62.5    | 4.75                 | 119           | 65       | 0.634          | 4.39            | 0.135       | 1.145    | 77.335           | 72.395             |
| Q3       |     | 72.25   | 5.5                  | 133           | 73       | 0.7            | 5.32            | 0.1525      | 1.615    | 90.385           | 75.6925            |

\*Normal plasma levels of CoQ10 in plasma: 0,5- 2 [µg/ml]; \*\*normal levels of CoQ10 in lymphocytes 70-160 [pmol/mg]; \*\*\* range of NNIPSS-PPS is 0-309 points; \*\*\*\* range of UMSARS is 0-109 points; nd (not done), Q10- coenzyme Q10, CS- citrate synthase, chol – plasma cholesterol, L- lymphocytes, P- plasma.

**Table S2.** The results of plasma and lymphocytes levels of coenzyme Q10 in healthy controls

| Healthy control | Sex | Age [y] | P-Q10 [µg/ml]* | P-cho[mmol/l] | P-Q10/cho[mmol/l] | L-Q10/CS | L-Q10 [pmol/mg]** | L-CS [nmol/min/mg] |
|-----------------|-----|---------|----------------|---------------|-------------------|----------|-------------------|--------------------|
| H1              | M   | 51      | 1.098          | 5.74          | 0.191             | 1.17     | 88.02             | 74.98              |
| H2              | M   | 73      | 1.201          | 4.23          | 0.284             | 1.30     | 86.74             | 66.88              |
| H3              | F   | 63      | 1.102          | 6.13          | 0.180             | 1.00     | 88.91             | 88.67              |
| H4              | F   | 60      | 1.217          | 5.98          | 0.204             | 1.27     | 112               | 88.35              |
| H5              | F   | 65      | 0.997          | 5.72          | 0.174             | 0.95     | 75.97             | 80                 |
| H6              | F   | 50      | 0.84           | 5.4           | 0.156             | 1.02     | 89.91             | 58.48              |
| H7              | F   | 62      | 1.015          | 6.03          | 0.168             | 1.03     | 88.61             | 85.91              |
| H8              | F   | 53      | 0.800          | 4.55          | 0.181             | 0.81     | 69.7              | 86.56              |
| H9              | F   | 50      | 0.683          | 5.46          | 0.117             | 0.14     | 78.43             | 68.61              |
| H10             | M   | 74      | 1.04           | 4.63          | 0.225             | 1.27     | 104.33            | 82.44              |
| H11             | M   | 58      | 0.703          | 6.34          | 0.111             | 0.81     | 63.71             | 78.87              |
| H12             | F   | 59      | 1.202          | 7.62          | 0.158             | 0.90     | 71.21             | 79.09              |
| H13             | F   | 52      | 0.896          | 5.46          | 0.164             | 1.33     | 94.94             | 71.6               |
| H14             | F   | 66      | 0.96           | 6.15          | 0.156             | 1.24     | 80.12             | 64.84              |
| H15             | F   | 57      | 0.947          | 6.55          | 0.145             | 1.38     | 102.77            | 74.41              |
| H16             | F   | 60      | 0.822          | 5.11          | 0.161             | 1.08     | 92.04             | 85.22              |
| H17             | F   | 55      | 1.241          | 6.16          | 0.201             | 1.27     | 92.43             | 73.02              |
| H18             | F   | 53      | 0.924          | 6.1           | 0.151             | 1.88     | 163.65            | 87.15              |
| H19             | M   | 54      | 0.864          | 5.48          | 0.158             | 1.13     | 95.83             | 84.06              |
| H20             | F   | 54      | 1.323          | 6.89          | 0.192             | 1.24     | 97.66             | 78.49              |
| H21             | M   | 52      | 0.698          | 4.82          | 0.145             | 0.98     | 71.2              | 72.51              |
| H22             | M   | 51      | 0.389          | 4.43          | 0.088             | 0.76     | 66                | 87.25              |
| H23             | F   | 58      | 0.916          | 4.91          | 0.187             | 1.11     | 79.27             | 71.4               |
| N               |     | 23      | 23             | 23            | 23                | 23       | 23                | 23                 |
| Average         |     | 57.82   | 0.95           | 5.67          | 0.169             | 1.09     | 89.28             | 77.77              |
| Median          |     | 57      | 0.947          | 5.72          | 0.161             | 1.11     | 88.02             | 78.87              |
| Q1              |     | 52      | 0.822          | 4.91          | 0.151             | 0.95     | 75.97             | 71.6               |
| Q2              |     | 57      | 0.947          | 5.72          | 0.164             | 1.11     | 88.61             | 78.87              |
| Q3              |     | 62      | 1.102          | 6.15          | 0.191             | 1.27     | 95.83             | 85.91              |

\*Normal plasma levels of CoQ10 in plasma: 0,5- 2 [µg/ml]; \*\*normal levels of CoQ10 in lymphocytes 70-160 [pmol/mg]; \*\*\* range of NNIPSS-PPS is 0-309 points; \*\*\*\* range of UMSARS is 0-109 points; nd (not done), Q10-coenzyme Q10, CS- citrate synthase, chol – plasma cholesterol, L- lymphocytes, P- plasma.

**Table S3.** The results of plasma and lymphocytes levels of coenzymeQ10 in patients with progressive supranuclear palsy and the clinical scales.

| Patient | Sex | Age   | Years of<br>progression | NNIPPS<br>/309 | PSP<br>RATING/<br>100 | P-Q10<br>[µg/ml]* | P-cho1<br>[mmol/<br>l] | P-Q10/<br>chol | L-Q10/CS | L-Q10<br>[pmol/mg]<br>** | L-CS<br>[nmol/mi<br>n/<br>mg] |
|---------|-----|-------|-------------------------|----------------|-----------------------|-------------------|------------------------|----------------|----------|--------------------------|-------------------------------|
| P1      | M   | 74    | 4,5                     | 103            | 39                    | 0.63              | 2.98                   | 0.211          | 0.92     | 60.07                    | 64.96                         |
| P2      | F   | 69    | 2                       | 119            | 56                    | 0.74              | nd                     | nd             | 0.92     | 62.54                    | 68.16                         |
| P3      | M   | 67    | 2                       | 62             | 23                    | 2.33              | nd                     | nd             | 1.56     | 107.17                   | 68.91                         |
| P4      | F   | 64    | 5                       | 120            | 50                    | 0.64              | nd                     | nd             | 1.19     | 86.47                    | 72.53                         |
| P5      | F   | 73    | 5                       | 164            | 64                    | 1.18              | nd                     | nd             | 1.34     | 96.15                    | 71.5                          |
| P6      | M   | 62    | 5.5                     | 142            | 59                    | 0.48              | nd                     | nd             | 0.95     | 52.89                    | 55.44                         |
| P7      | M   | 81    | 4                       | 157            | 70                    | 0.24              | 3.04                   | 0.079          | 1.73     | 135.72                   | 78.36                         |
| P8      | F   | 70    | 1.5                     | 104            | 24                    | 0.53              | 3.2                    | 0.166          | 1.33     | 106.91                   | 80.23                         |
| P9      | M   | 74    | 1                       | 153            | 66                    | 0.4               | 2.97                   | 0.135          | 1.51     | 82.7                     | 54.91                         |
| P10     | M   | 53    | 4                       | 48             | 18                    | 0.99              | 4.38                   | 0.226          | 1.41     | 96.01                    | 68.3                          |
| P11     | F   | 77    | 4.5                     | 110            | 49                    | 0.815             | 6.16                   | 0.132          | 1.11     | 85.6                     | 77.01                         |
| P12     | M   | 76    | 6                       | 101            | 43                    | 0.226             | 1.66                   | 0.136          | 1.31     | 82.7                     | 63                            |
| P13     | M   | 76    | 8                       | 131            | 69                    | 0.63              | 4.66                   | 0.135          | 1.20     | 91.2                     | 75.73                         |
| P14     | M   | 75    | 2                       | 90             | 53                    | 0.448             | 3.07                   | 0.146          | 0.79     | 61.73                    | 78.07                         |
| P15     | M   | 85    | 6.5                     | 53             | 19                    | 0.596             | 4.31                   | 0.14           | 1.13     | 94.92                    | 84.33                         |
| P16     | M   | 75    | 4.5                     | 58             | 21                    | 0.455             | 2.61                   | 0.17           | 1.48     | 93.55                    | 63.08                         |
| P17     | F   | 82    | 2                       | 73             | 29                    | 0.822             | 4.62                   | 0.18           | 1.28     | 94.94                    | 74.24                         |
| P18     | M   | 66    | 2                       | 51             | 28                    | 0,5               | 4.94                   | 0.1            | 1.23     | 98.45                    | 80.25                         |
| P19     | F   | 70    | 4.5                     | 131            | 58                    | 0.621             | 4.94                   | 0.126          | 1.00     | 67.87                    | 68.2                          |
| P20     | M   | 77    | 9.5                     | 149            | 63                    | 0.264             | 3.71                   | nd             | 0.84     | 59.35                    | 70.62                         |
| P21     | M   | 68    | 8.5                     | 157            | 63                    | 0.386             | 4.27                   | nd             | 1.148613 | 105.19                   | 91.58                         |
| N       |     | 21    | 21                      | 21             | 21                    | 21                | 16                     | 14             | 1        | 21                       | 21                            |
| average |     | 72.09 | 4.4                     | 108.38         | 45.9                  | 0.62              | 3.84                   | 0.148          | 1.21     | 86.7                     | 71.8                          |
| median  |     | 74    | 4.5                     | 110            | 49.5                  | 0.596             | 3.99                   | 0.138          | 1.2      | 91.2                     | 71.5                          |
| Q1      |     | 67.5  | 2                       | 67.5           | 26                    | 0.424             | 2.995                  | 0.1305         | 0.975    | 65.205                   | 66.56                         |
| Q2      |     | 74    | 4.5                     | 110            | 50                    | 0.596             | 3.99                   | 0.138          | 1.2      | 91.2                     | 70.5                          |
| Q3      |     | 76.75 | 5.75                    | 145.5          | 63                    | 0.7775            | 4.65                   | 0.1725         | 1.375    | 97.3                     | 78.215                        |

\*\*\*\*\*

range of PSP RATING scale is 0-100 points

\*Normal plasma levels of CoQ10 in plasma: 0,5- 2 [µg/ml]; \*\*normal levels of CoQ10 in lymphocytes 70-160 [pmol/mg]; nd (not done), Q10- coenzyme Q10, CS- citrate synthase, chol – plasma cholesterol, L- lymphocytes, P- plasma

**Table S4.** The results of plasma and lymphocytes levels of coenzyme Q10 in patients with Parkinson's disease.

| Patient | Sex | Age  | Years of progression | P-Q10 [µg/ml]* | P-chol [mmol/L] | P-Q10/ chol | L- Q10/CS | L-Q10 [pmol/mg]** | L-CS [nmol/min/mg] |
|---------|-----|------|----------------------|----------------|-----------------|-------------|-----------|-------------------|--------------------|
| P1      | F   | 38   | 4                    | 0.851          | 4.75            | 0.179       | 1.41      | 115.46            | 81.88              |
| P2      | F   | 73   | 10                   | 0.457          | 3.62            | 0.126       | 1.57      | 116.32            | 77.2               |
| P3      | F   | 59   | 4                    | 0.687          | 6               | 0.115       | 1.09      | 84.62             | 77.83              |
| P4      | M   | 65   | 7                    | 0.86           | 4.5             | 0.191       | 1.54      | 121.32            | 79.02              |
| P5      | M   | 80   | 14                   | 0.409          | 3.12            | 0.131       | 1.17      | 85.27             | 72.66              |
| P6      | M   | 67   | 6                    | 0.553          | 3.68            | 0.15        | 1.46      | 115.74            | 79.21              |
| P7      | M   | 63   | 11                   | 0.945          | nd              | nd          | 1.30      | 89.51             | 68.74              |
| P8      | M   | 47   | 5                    | 0.48           | 3.75            | 0.128       | 0.85      | 70.18             | 82.49              |
| P9      | M   | 60   | 3                    | 0.628          | 4.16            | 0.151       | 1.22      | 89.65             | 73.23              |
| P10     | F   | 53   | 1                    | 0.677          | 5.42            | 0.125       | 1.09      | 84.46             | 77.23              |
| P11     | F   | 56   | 2                    | 0.215          | 3.91            | nd          | 0.98      | 67.74             | 68.49              |
| P12     | M   | 72   | 5                    | 0.679          | 3.55            | 0.191       | 0.93      | 75.76             | 81.52              |
| P13     | M   | 83   | 1                    | 0.31           | 3.41            | 0.091       | 0.88      | 64.93             | 73.94              |
| P14     | F   | 71   | 13                   | 0.505          | nd              | nd          | 1.39      | 51.88             | 37.21              |
| P15     | F   | 55   | 14                   | 0.52           | 4.2             | 0.124       | 1.31      | 97.75             | 74.86              |
| P16     | F   | 64   | 5                    | 0.76           | 4.57            | 0.166       | 1.68      | 114.79            | 68.32              |
| P17     | M   | 50   | 11                   | 0.93           | 3.68            | 0.253       | 1.51      | 108.85            | 72.14              |
| P18     | F   | 69   | 8                    | 1.13           | 4.72            | 0.239       | 2.49      | 140.95            | 56.69              |
| P19     | F   | 73   | 17                   | 0.66           | 3.65            | 0.181       | 1.68      | 97.94             | 58.38              |
| P20     | F   | 67   | 8                    | 1.09           | 4.81            | 0.227       | 1.21      | 91.24             | 75.26              |
| P21     | F   | 65   | 15                   | 0.39           | nd              | nd          | 1.21      | 84.16             | 69.44              |
| N       |     | 21   | 21                   | 21             | 18              | 17          | 21        | 21                | 21                 |
| average |     | 63.3 | 7.8                  | 0.65           | 4.19            | 0.16        | 1.33      | 93.73             | 71.55              |
| median  |     | 65   | 7                    | 0.66           | 4.04            | 0.1585      | 1.3       | 89.65             | 73.94              |
| Q1      |     | 55.5 | 4                    | 0.4685         | 3.65            | 0.1255      | 1.09      | 79.96             | 68.615             |
| Q2      |     | 65   | 7                    | 0.66           | 4.16            | 0.1151      | 1.3       | 89.65             | 73.94              |
| Q3      |     | 71.5 | 12                   | 0.8555         | 4.75            | 0.191       | 1.525     | 115.125           | 78.425             |

\*Normal plasma levels of CoQ10 in plasma: 0.5- 2 [µg/ml]; \*\*normal levels of CoQ10 in lymphocytes 70-160 [pmol/mg]; nd (not done), Q10- coenzyme Q10, CS- citrate synthase, chol – plasma cholesterol, L- lymphocytes, P- plasma.

**Table S5.** P-values for comparison of variables between patients groups and controls and within patient groups. Differences between healthy controls and particular patient groups were analyzed using a two-sample t-test. Differences among patient groups were subject to a one-way ANOVA. P-values less than 5% were considered as statistically significant. Analyses were conducted using an R statistical package version 4.2.2. MSA – multiple system atrophy, PD – Parkinson’s disease, PSP – progressive supranuclear palsy, HC – healthy controls, chol- cholesterol.

|                    | Comparison |           |            |                |
|--------------------|------------|-----------|------------|----------------|
|                    | HC and MSA | HC and PD | HC and PSP | Patient Groups |
| Q10 plasma         | 0.0000     | 0.0002    | 0.0131     | 0.8667         |
| Q10 lymphocytes    | 0.0397     | 0.4927    | 0.6864     | 0.0329         |
| Q10/CS lymphocytes | 0.6505     | 0.0414    | 0.3176     | 0.0406         |
| CS lymphocytes     | 0.0047     | 0.0098    | 0.0068     | 0.8621         |
| Q10/chol plasma    | 0.0032     | 0.4003    | 0.0412     | 0.2997         |
| Cholesterol        | 0.0005     | 0.0000    | 0.0000     | 0.0398         |
